# Supplementary material
Source: PubMed Central journal article supplement (PMC4818561)

**Figure e-1: Quantile-Quantile Plot of the 4 phenotypes studied in the discovery phase.** (A) all IS (B) LVD (C) CE and (D) SVD. The expected distribution is shown by the red line. The observed distribution of the test statistic is shown in black.

**(A)**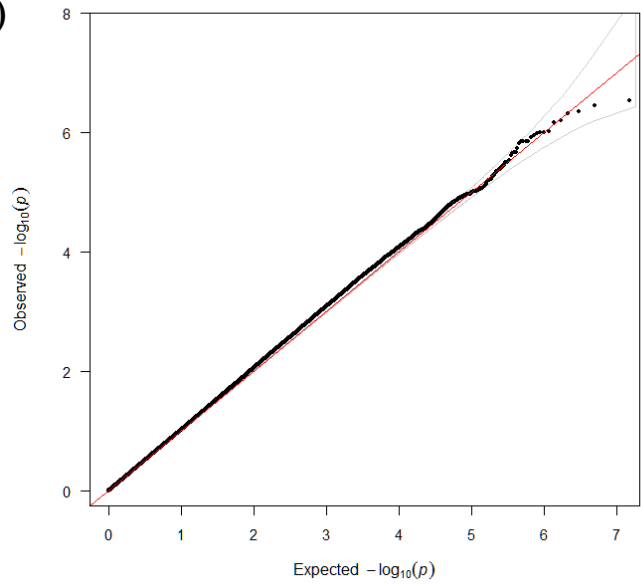**(B)**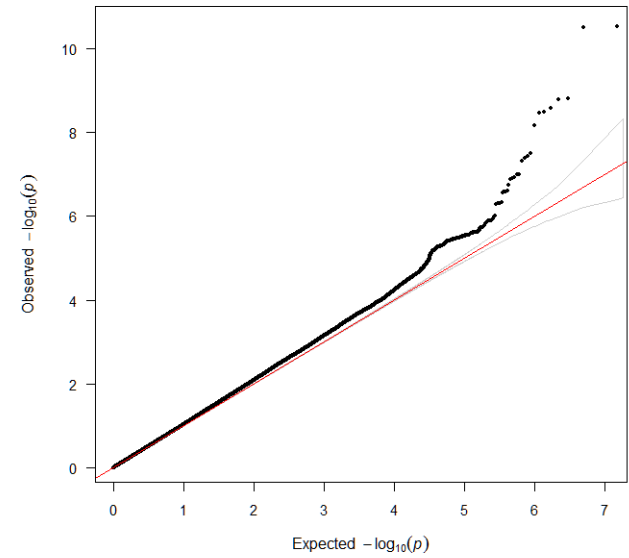**(C)**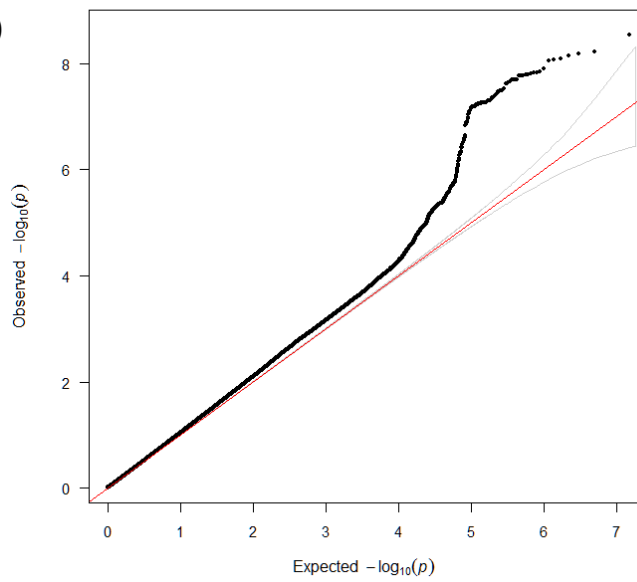**(D)**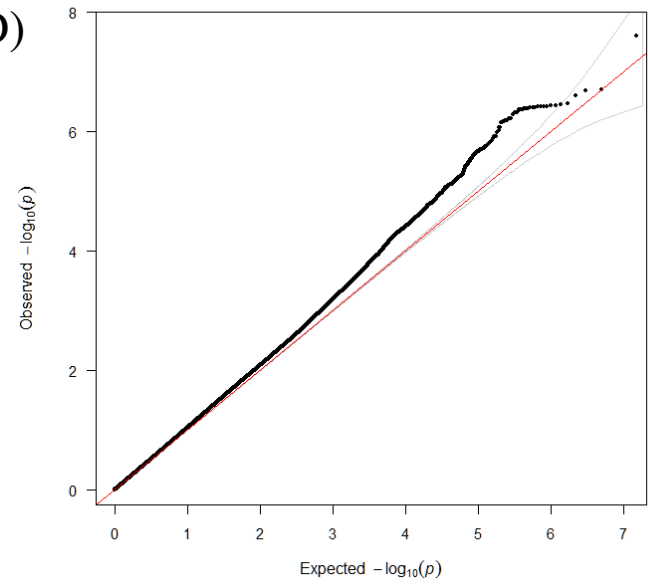

Supplement: supp_WNL.0000000000002528_Figure_e-1.pdf [file supp_WNL.0000000000002528_Figure_e-1.pdf]
