# Supplementary material
Source: PubMed Central journal article supplement (PMC4818561)

**Figure e-2: Quantile-Quantile Plots of all individual studies (all IS).** From top left to bottom right, the studies are: ASGC, BRAINS, GASROS\_affy, GASROS\_illumina, GEOS, HPS, ISGS-SWISS MILANO, VISP, WHI, WTCCC2-D and WTCCC2-UK.

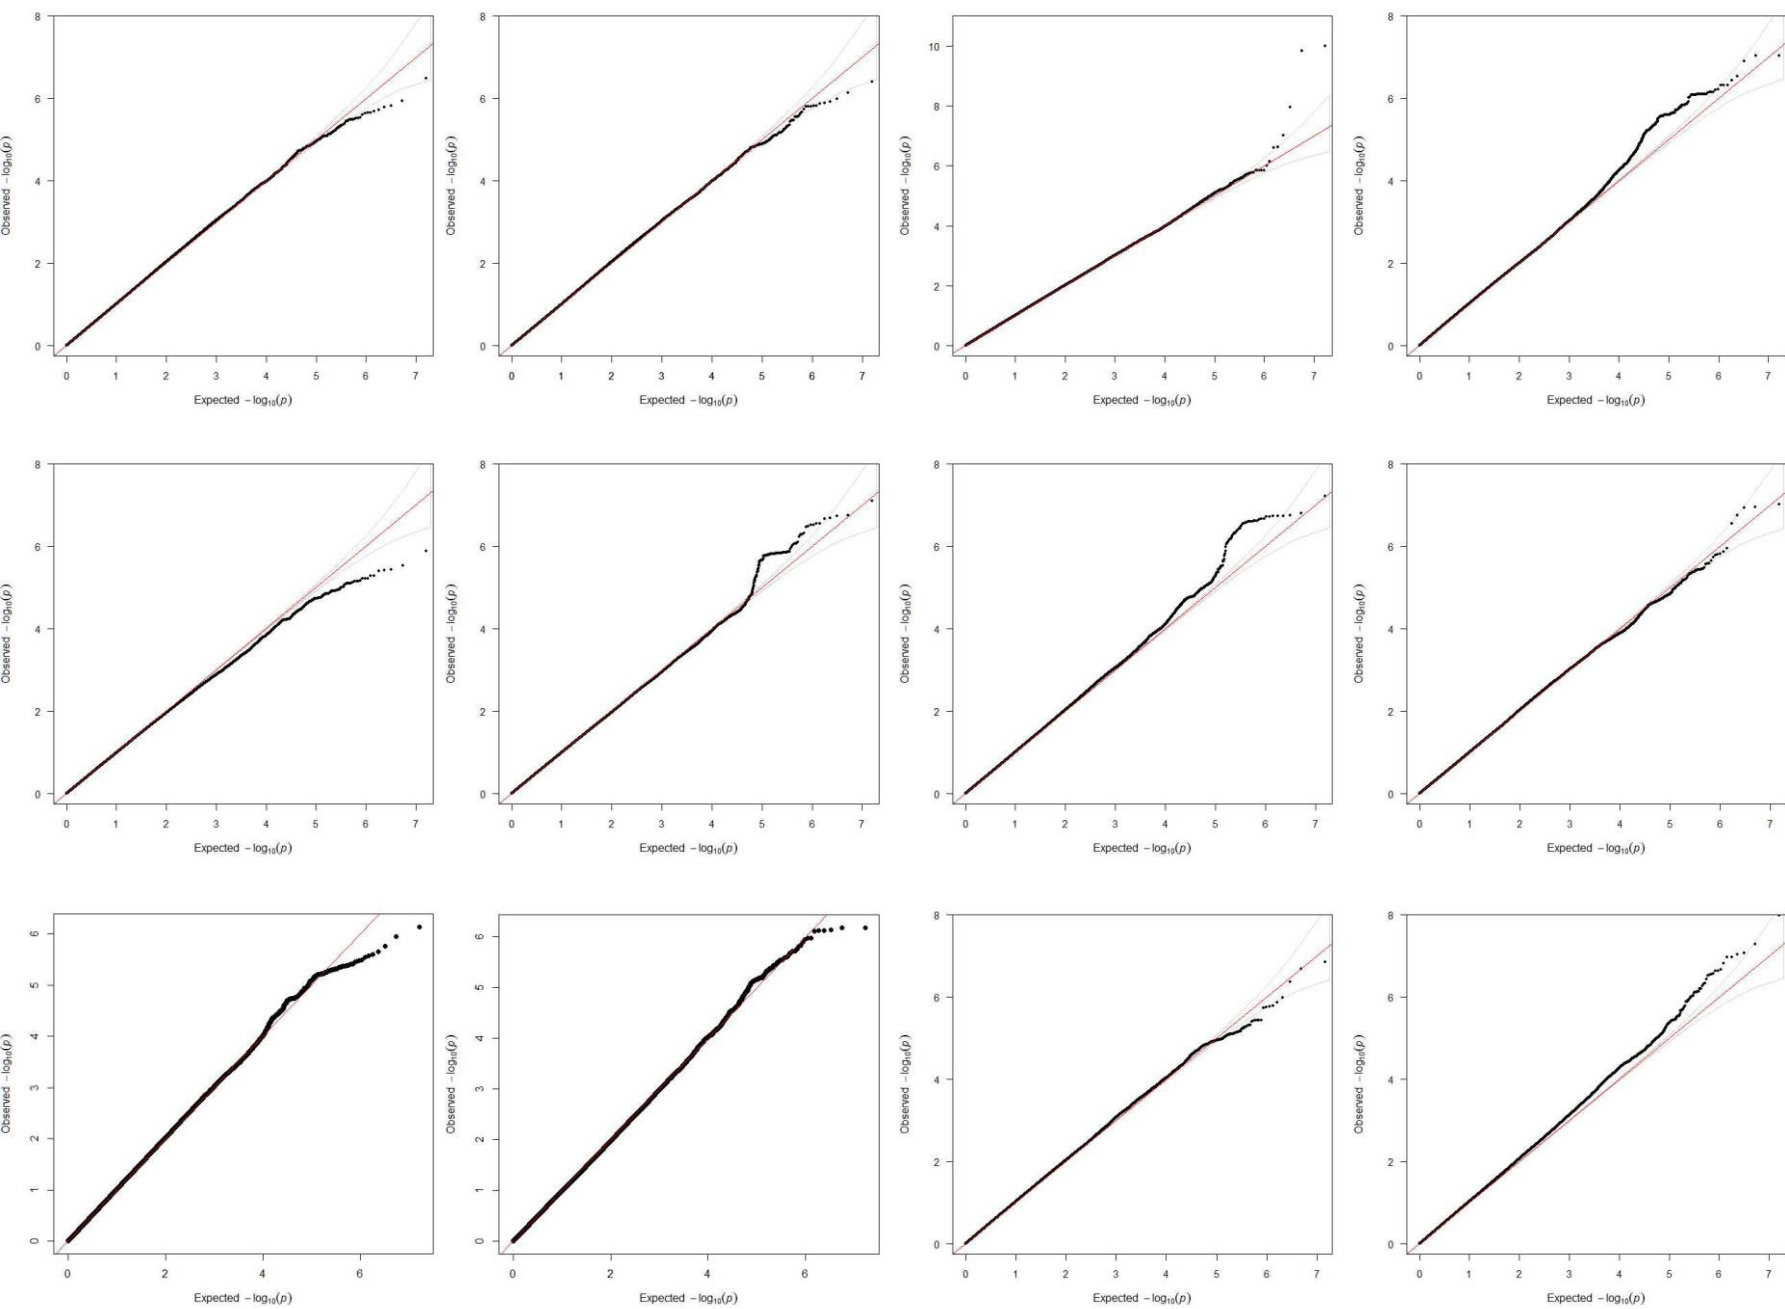

Supplement: supp_WNL.0000000000002528_Figure_e-2.pdf [file supp_WNL.0000000000002528_Figure_e-2.pdf]
