# Supplementary material
Source: PubMed Central journal article supplement (PMC4818561)

**Figure e-3: Manhattan Plot of the all IS phenotype.** The x-axis depicts the chromosomal position, the y-axis the  $-\log_{10}(p)$ .

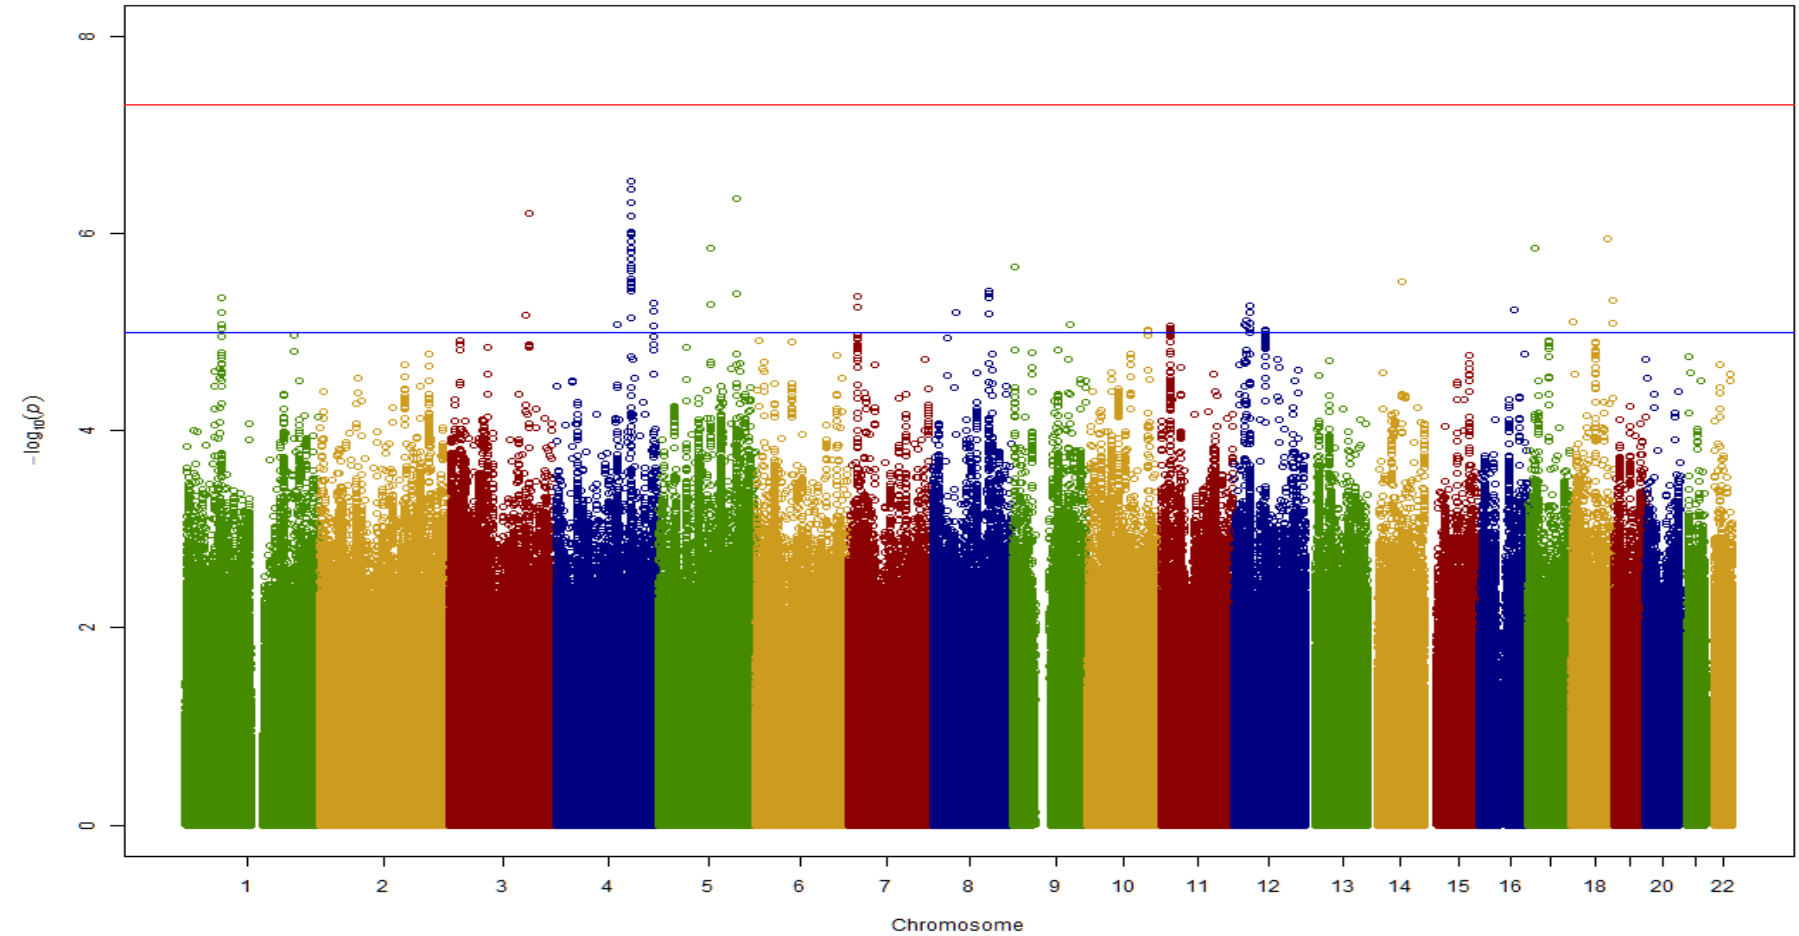

Supplement: supp_WNL.0000000000002528_Figure_e-3.pdf [file supp_WNL.0000000000002528_Figure_e-3.pdf]
