# Supplementary material
Source: PubMed Central journal article supplement (PMC4818561)

**Figure e-4: Manhattan Plot of the LVD Phenotype.** The x-axis depicts the chromosomal position, the y-axis the  $-\log_{10}$  of the p-value.

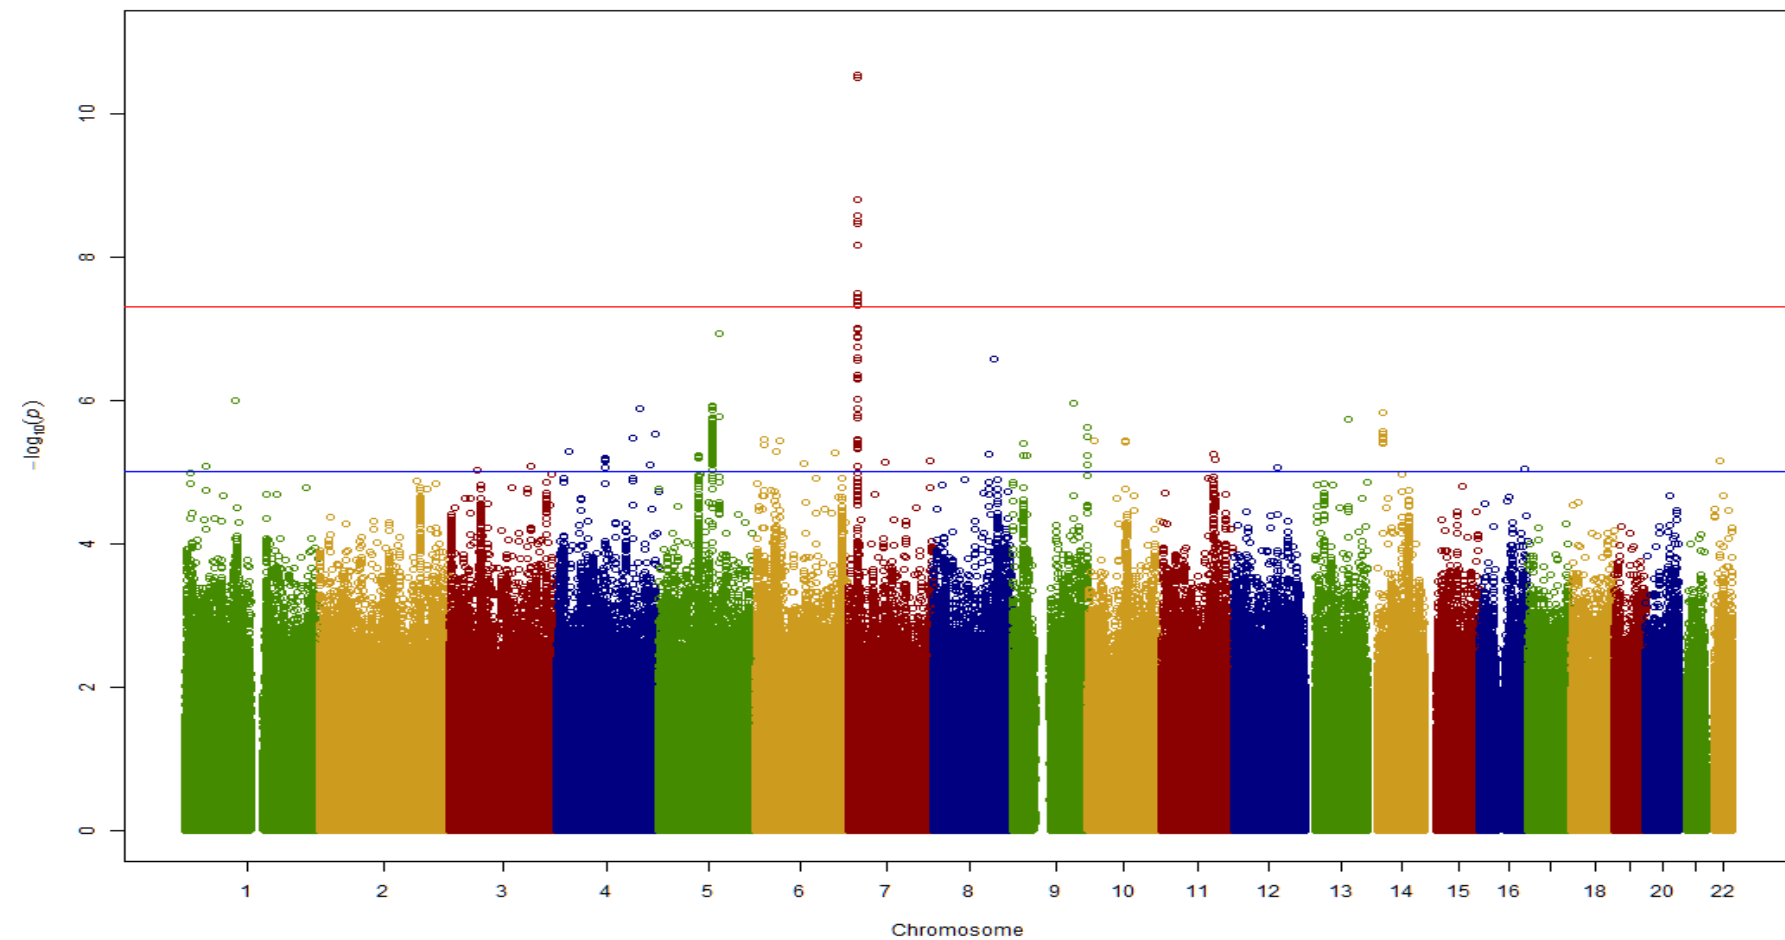

Supplement: supp_WNL.0000000000002528_Figure_e-4.pdf [file supp_WNL.0000000000002528_Figure_e-4.pdf]
