# Supplementary material
Source: PubMed Central journal article supplement (PMC4818561)

**Figure e-6: Manhattan Plot of the SVD subphenotype.** The x-axis depicts the chromosomal position, the y-axis the  $-\log_{10}(p)$  of the p-value.

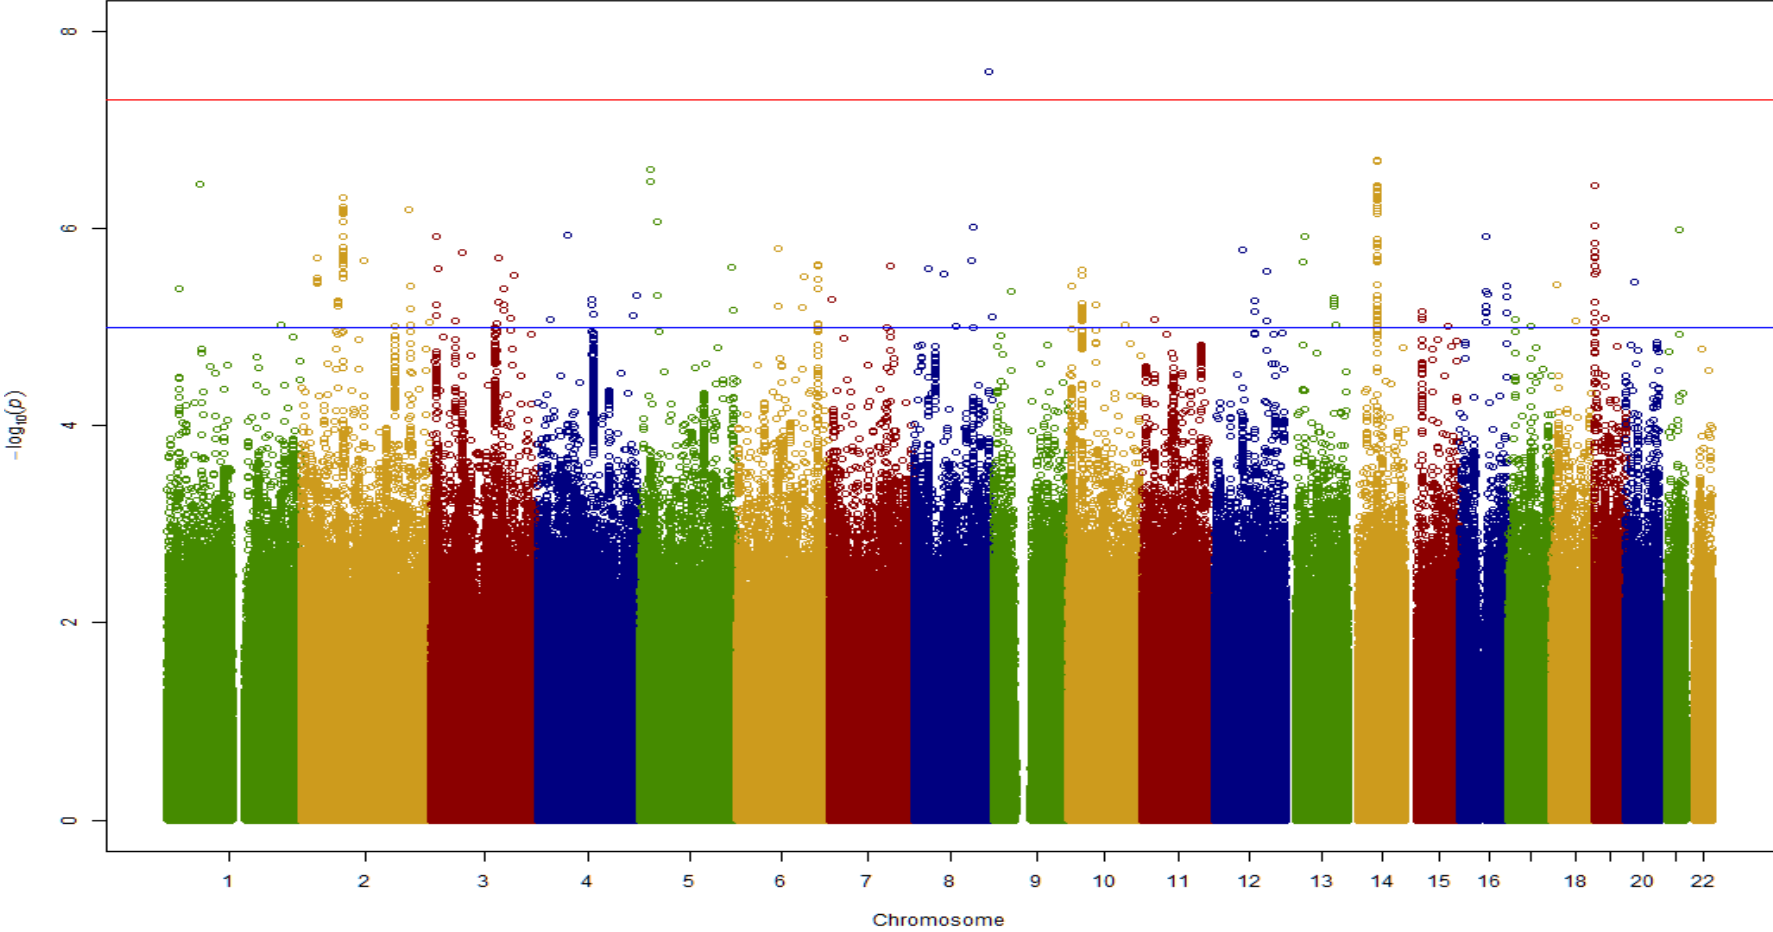

Supplement: supp_WNL.0000000000002528_Figure_e-6.pdf [file supp_WNL.0000000000002528_Figure_e-6.pdf]
