# Supplementary material
Source: PubMed Central journal article supplement (PMC4818561)

Figure e-7: Locuszoom Plots of genome-wide-significant signals in the discovery sample ((A) ABO, (B) HDAC9, (C) PITX2 and (D) ZFHX3). Genomic position is depicted on the x-axis. The y-axis shows the  $-\log(10)$  of the p-value. The SNP given is the new lead SNP in the trans-ethnic meta-analysis. Purple diamonds display the previously published lead SNPs. (see Table 1)

Figure e-7 (A)

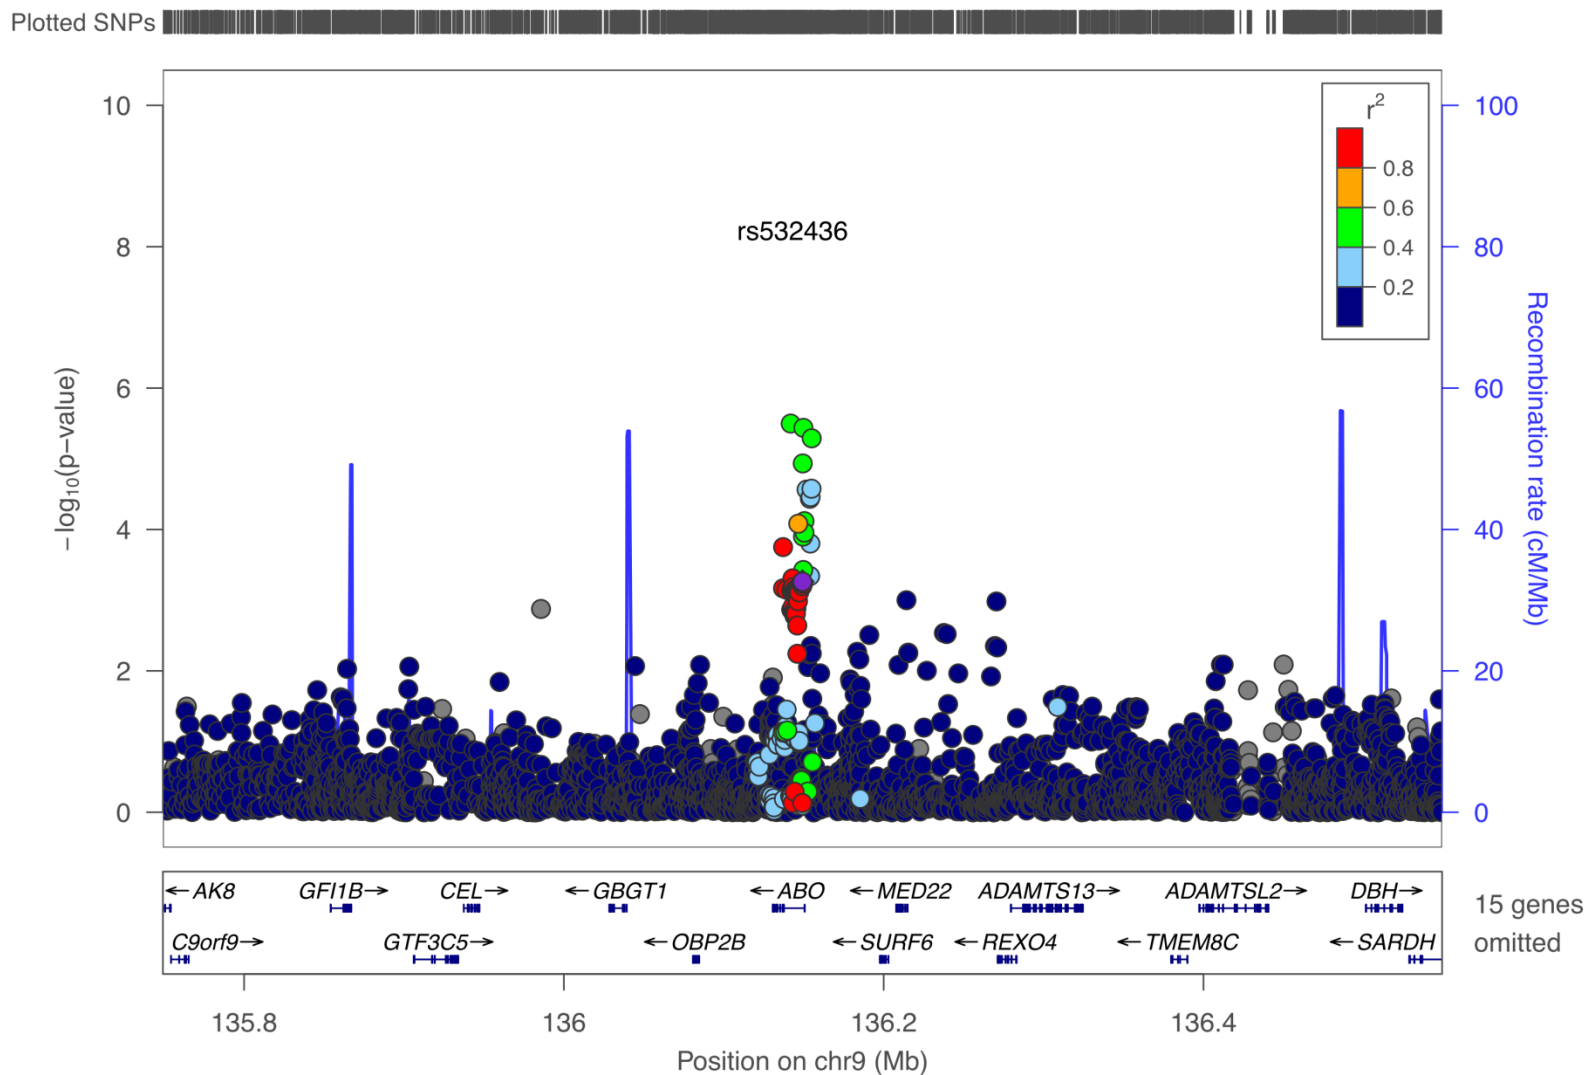

Figure e-7 (B)

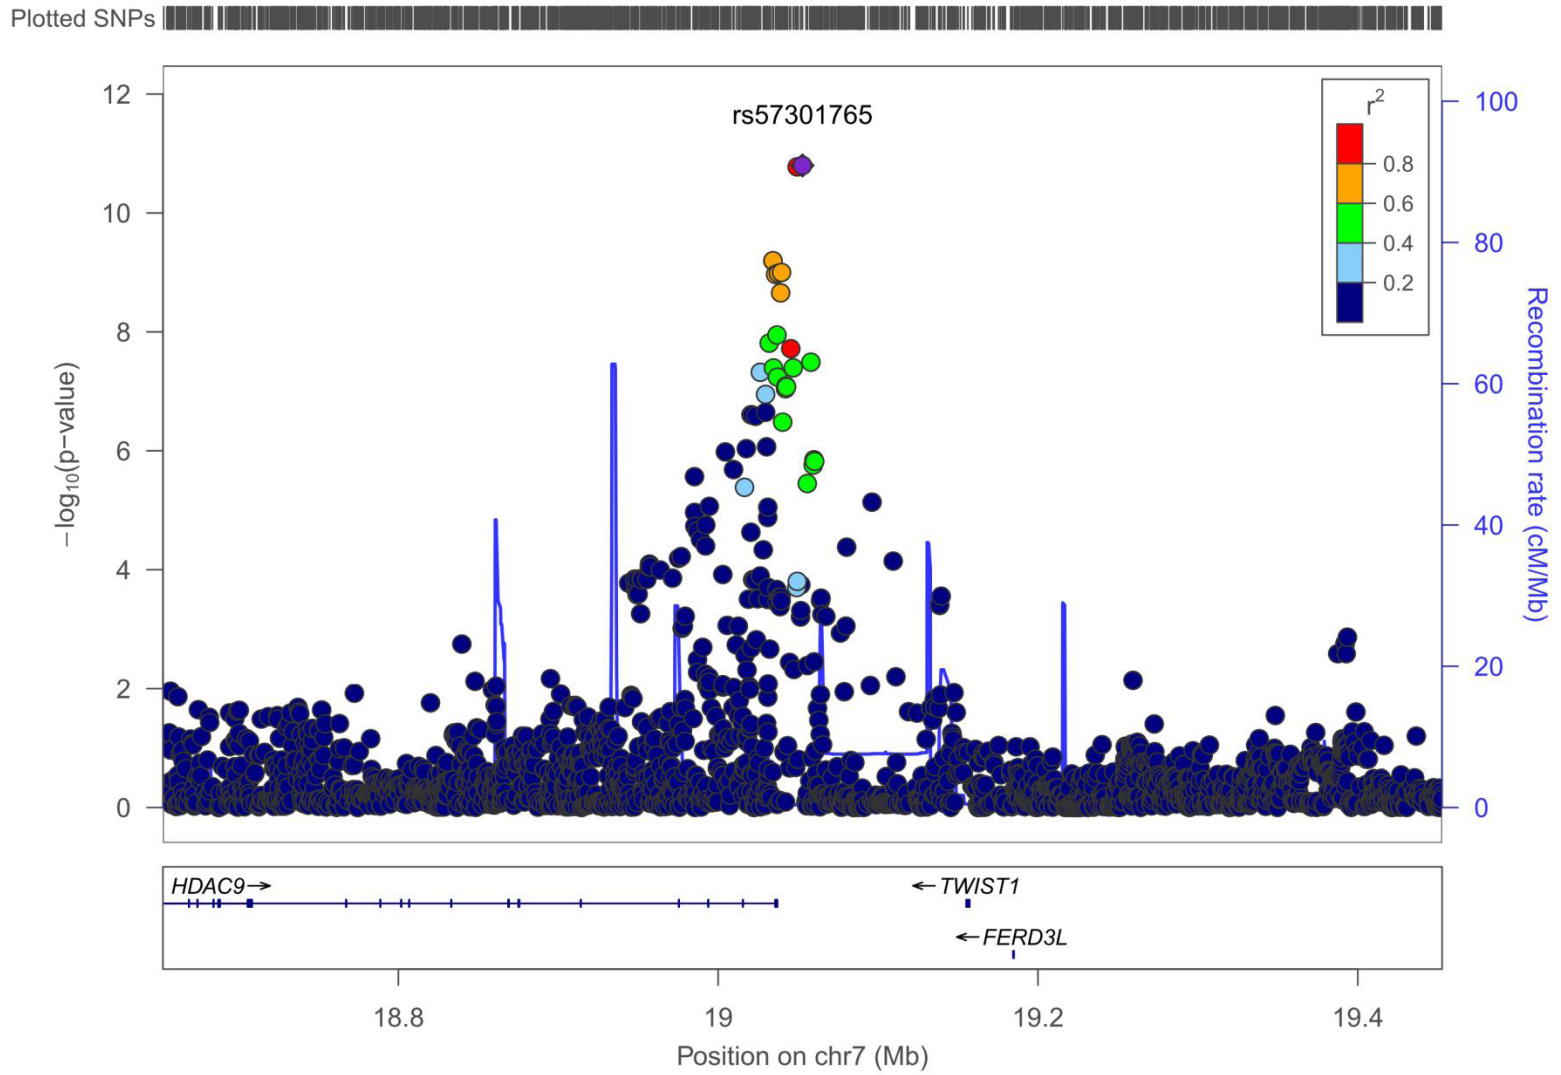

Figure e-7 (C)

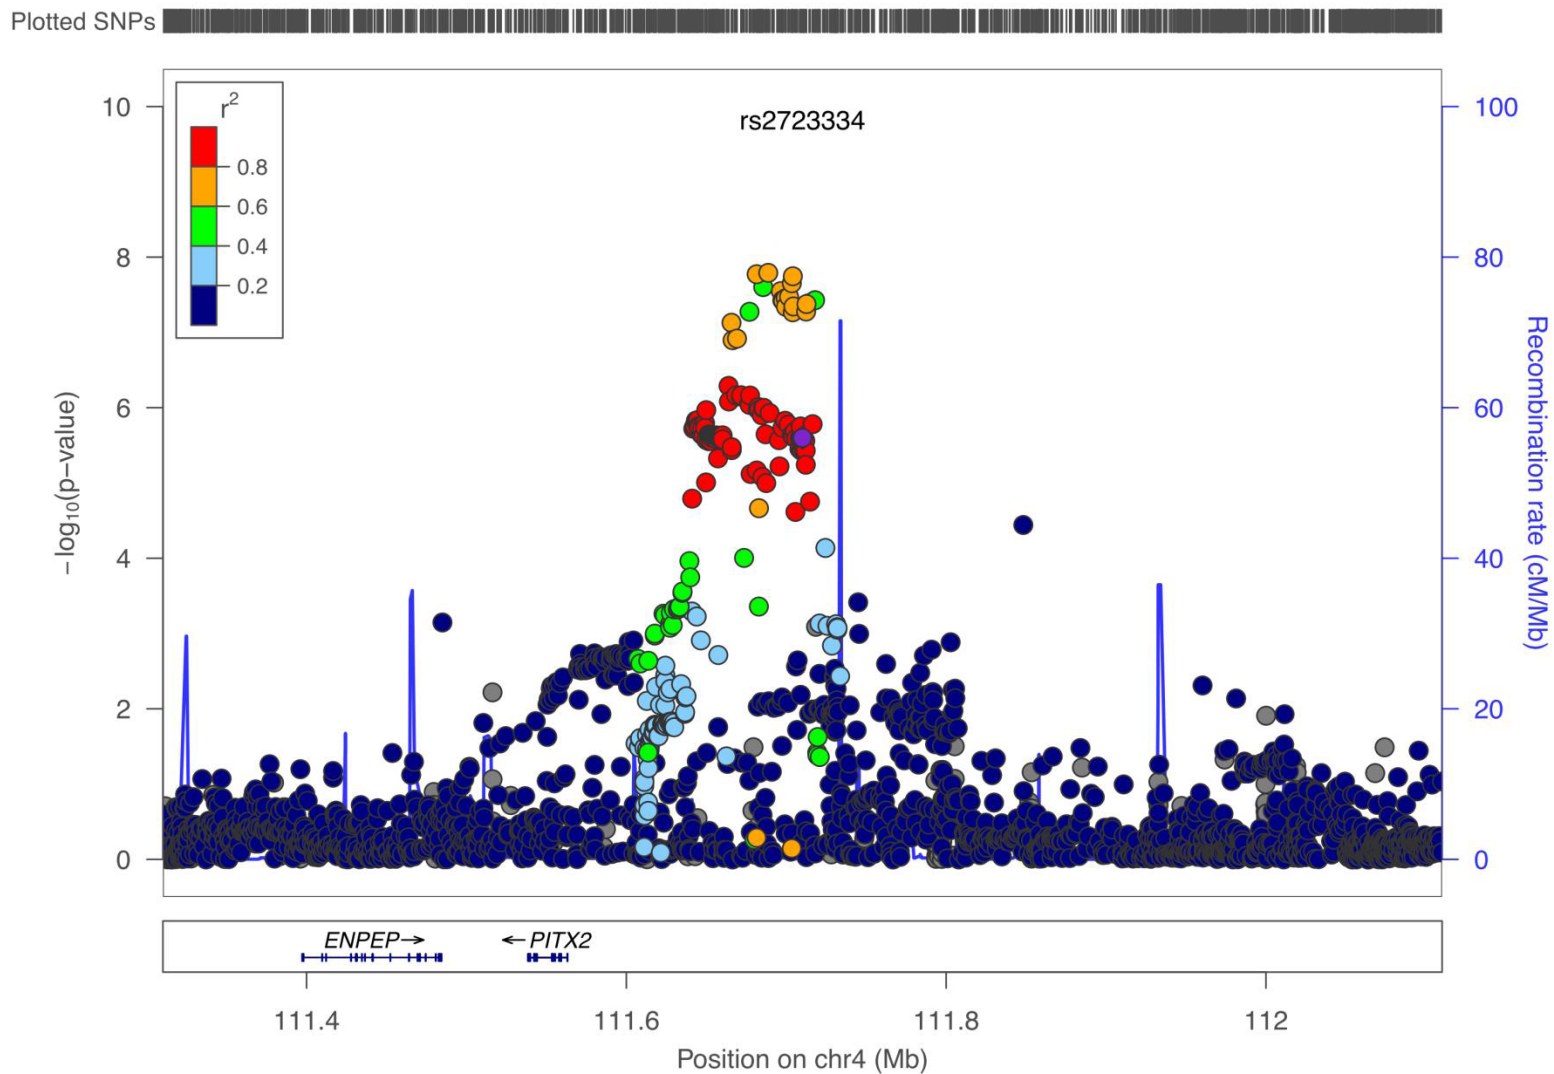

Figure e-7 (D)

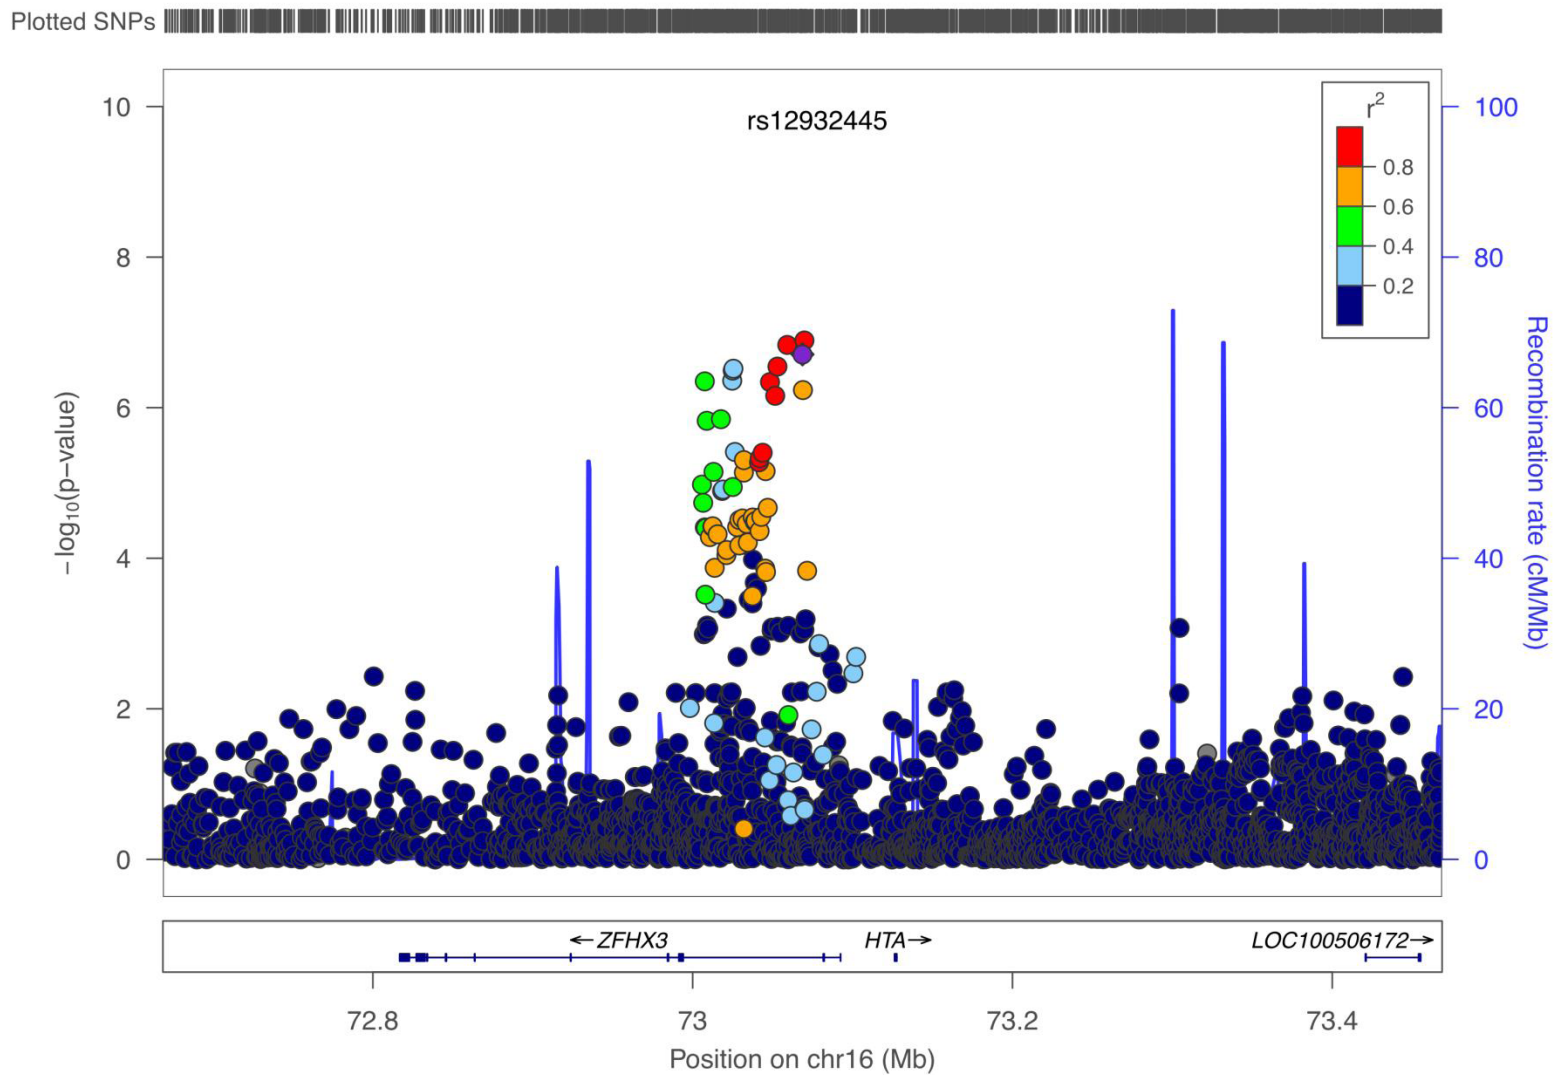

Supplement: supp_WNL.0000000000002528_Figure_e-7.pdf [file supp_WNL.0000000000002528_Figure_e-7.pdf]
